# Supplementary material for: Nuclear CSPP1 expression defined subtypes of basal-like breast cancer
Source: PubMed Central journal article supplement — Br J Cancer. 2014 Jun 5;111(2):326–38. doi: 10.1038/bjc.2014.297 (PMC4102947; doi:10.1038/bjc.2014.297), 2014-06-05
Supplement: bjc2014297x1.pdf [file bjc2014297x1.pdf]

## Supplementary Figures & Tables

### Supplementary Figure S1

#### **Schematic presentation of *CSPP1* gene structure and gene products and *CSPP1* specific probes and reagents.**

(A) Schematic alignment of *CSPP1* on chromosome 8q13.1-2 and reported mRNAs of splice isoforms, gene expression array probes (cDNA arrays: IMAGE.x, Agilent platform A\_x), shRNA target regions (shRNA\_x), and transcriptional control elements (data from UCSC GoldenPath genome browser). Regions in mRNAs comprising coding regions for a-CSPP-L (green) and a-CSPP/CSPP-L (red) epitopes are indicated. (B) Schematic alignment of CSPP and CSPP-L protein structure and annotation of functional domains. CSPP-L specific regions are indicated in grey. Predicted coiled-coil regions are depicted as bold bars.

### Supplementary Figure S2

#### **Comparison of immunohistochemical staining of a-CSPP-L and a-CSPP/CSPP-L antibodies in normal human mammary gland tissue.**

Immunohistochemical staining of normal mammary gland from mastectomy tissue with CSPP-L specific (a-CSPP-L) or the common CSPP and CSPP-L targeting a-CSPP/CSPP-L antibody shows prominent staining of breast epithelial cells. Only a-CSPP/CSPP-L shows nuclear staining of lumen lining but not basal membrane lining epithelial cells.

### Supplementary Figure S3

#### **CSPP-L expression and occurrence of centrosome amplification in selected breast cancer cell lines**

(A) Immunoblots of total cell lysates of breast cancer cell lines for CSPP-L and  $\gamma$ -tubulin: MDA-MB-231 (basal, BaB), HCC38 (basal, BaB), HCC1937 (basal, BaA), ZR-75-1 (luminal, LuA), MCF7 (luminal, LuA). Basal type cell lines show higher expression of CSPP-L ( $\alpha$ -CSPP-L) than luminal A type cell lines relative to the loading control protein  $\gamma$ -tubulin ( $\alpha$ -GTU-88). (B) Immunoblots of total cell lysates of luminal A (MCF7, ZR-75-1) and luminal B type breast cancer cell lines (UACC-812, BT-474) for CSPP-L and  $\gamma$ -tubulin indicate no prominent differences in CSPP-L expression. Exposure time for CSPP-L detection was increased compared to (A). (C) Quantification of centrosome amplification in the six breast cancer cell lines used in Figure 2A. (# of  $\gamma$ -tubulin stained

centrosomal foci per cell, at least 150 cells were scored per cell line; error bars depict standard error of the mean). Basal type breast cancer cell lines show higher frequency of centrosome amplification than luminal type cell lines.

#### **Supplementary Figure S4**

##### **Correlation of *CSPP1* gene copy number alterations and mean *CSPP1* mRNA expression in Oslo0/Ull and Oslo1/MicMa cohorts of primary operable breast cancer.**

(A) Extended analysis of PAM50 subtype specific mean *CSPP1* mRNA expression in Oslo0/Ull cohort (n=80) as shown in Fig4I, here including tabular overview of paired statistical significance analysis (left panel). PAM50 subtype specific correlation plots of *CSPP1* copy number and mean mRNA expression (right panels). Regression correlation values are indicated. (B) PAM50 subtype specific mean *CSPP1* mRNA expression in Oslo1/Ull cohort (n=115) with tabular overview of paired statistical significance analysis (left panel). PAM50 subtype specific correlation plots of *CSPP1* copy number and mean mRNA expression (right panels). Regression correlation values are indicated.

#### **Supplementary Figure S5**

##### **Validation of differential gene expression in nuclear CSPP1 positive and negative basal-like breast carcinomas.**

(A) Hierarchical cluster analysis of basal-like breast carcinomas in the Oslo0/Ull cohort used for identification of differentially expressed genes between nuclear CSPP1 positive and negative cases. (B) Identical to Fig5B,C. Hierarchical cluster analysis of all basal-like breast carcinomas in the Oslo0/Ull cohort on basis of the identified differentially expressed genes. Scoring results are indicated for cases with immunohistochemical CSPP1 staining. Cases used for SAM are indicated with # symbol (upper panel). Box plots of PAM50 breast cancer subtype centroid correlation coefficients of “nuclear CSPP1 negative” and “nuclear CSPP1 positive” cluster group biopsies (lower panel). P-values indicate statistically significant differences in median correlation coefficients (t-test or (\*) Mann-Whitney). (C) Analysis of basal-like breast cancer biopsies of the Oslo1/MicMa cohort (n=26) as described in (B).

### **Supplementary Figure S6**

#### **PAM50 subtype specific mean mRNA expression of *CSPP1* and genes of the 8-gene signature in METABRIC Discovery and Validation cohorts**

Whisker-hair plots of PAM50 subtype specific mean mRNA expression of indicated genes. *CSPP1* expression panel is identical to Fig6A. Paired statistical significance analysis for PAM50 subtype specific expression differences are listed in Supplementary table 3.

### **Supplementary Figure S7**

#### **PAM50 subtype specific mean mRNA expression of *CSPP1*, *ESR*, *EGFR*, *ERBB2*, *PGR*, and *MKI67* in METABRIC Discovery and Validation cohorts**

Whisker-hair plots of PAM50 subtype specific mean mRNA expression of indicated genes. *CSPP1* expression panel is identical to Fig6A. Paired statistical significance analysis for PAM50 subtype specific expression differences are listed in Supplementary table 3.

### **Supplementary Figure S8**

#### **Effects of serum starvation and $\beta$ -estradiol stimulation on the expression of CSPP1 proteins in MCF7 cells.**

(A) Immunoblots of total cell lysates of MCF7 breast cancer cells grown in phenolred containing DMEM supplemented with 0.01 mg/ml human recombinant insulin and 10% fetal calf serum (FCS) and stimulated for 24h with indicated doses of  $\beta$ -estradiol (E2). Expression of CSPP-L ( $\alpha$ -CSPP-L) increases relative to the loading control protein  $\gamma$ -tubulin in an E2 dependent manner, as monitored by increased phosphorylation of the estrogen receptor alpha ( $\alpha$ -P-Ser104/106-ER $\alpha$ ). (B-D) MCF7 breast cancer cells grown in phenolred free DMEM medium using different additives. Cells were grown to 60% confluence in 10% FCS supplemented DMEM. The medium was then changed to DMEM + 10% FCS for 48h (control), DMEM + 0.1% FCS (serum starved 48h), DMEM + 0.1% FCS for 24h followed by re-stimulation with DMEM + 10% FCS + 200nM E2, or DMEM + 10% FCS + 200nM E2 for 48h. CSPP1 protein expression was determined by immunoblotting for CSPP-L relative to  $\gamma$ -tubulin (B), immunofluorescence microscopy for CSPP-L (green),  $\gamma$ -tubulin (red), and DNA (blue) (C). Cell cycle phase distribution and total CSPP1 protein expression was measured by FACS analysis in parallel samples by staining for  $\alpha$ -CSPP/CSPP-L and DNA content (Hoechst) (D). Serum starved MCF7 cells

## Nuclear CSPP1 expression in breast cancer

arrested in G<sub>0</sub>/G<sub>1</sub>-phase (DNA histogram in (D)) and showed flattened morphology (data not shown). Re-stimulation of serum starved MCF7 cells with serum and E2 induced release from cell cycle arrest (increased S-phase fraction in DNA histogram, (D)) and cell rounding and cell-cell contact formation (data not shown). Total CSPP1 protein expression (α-CSPP/CSPP-L staining intensity in FACS analysis) was cell cycle phase independent and only slightly increased in response to E2 stimulation (dot blots, (D)). In contrast, CSPP-L expression is sensitive to serum starvation and induced upon E2 stimulation (A and B). CSPP-L partially co-localized with γ-tubulin at the centrosome and concentrated in centrosome surrounding granules reminiscent of centriolar satellites (C).

**Supplementary Table 1**

**Cross tabulation of nuclear CSPP1 expressing cancer cell frequency and cytoplasmic CSPP1 expression.**

CSPP1 expression varied both within and between tumor samples in the Oslo0/UII cohort. The frequency of tumor cells with nuclear staining were grouped into four categories (0=0-2%; 1=2-50%, 2=50%-75% and 3=>75%). Cytoplasmic staining of tumor cells was scored only by intensity (0=absent, 1=weak, 2=medium, 3=strong).

**Supplementary Table 2**

**Clinico-pathological features and the CSPP1 expression groups in the Oslo0/UII cohort.**

p-values calculated by Fisher's exact test.

**Supplementary Table 3**

**Cross tabulations of paired statistical significance analysis for subtype specific expression of selected genes in METABRIC Discovery and Validation cohorts**

p-values <0.05 are considered as statistically significant and highlighted in bold

# Supplementary Figure S1

A

genome, gene expression array probes, shRNA target sequences and mRNA sequences alignment

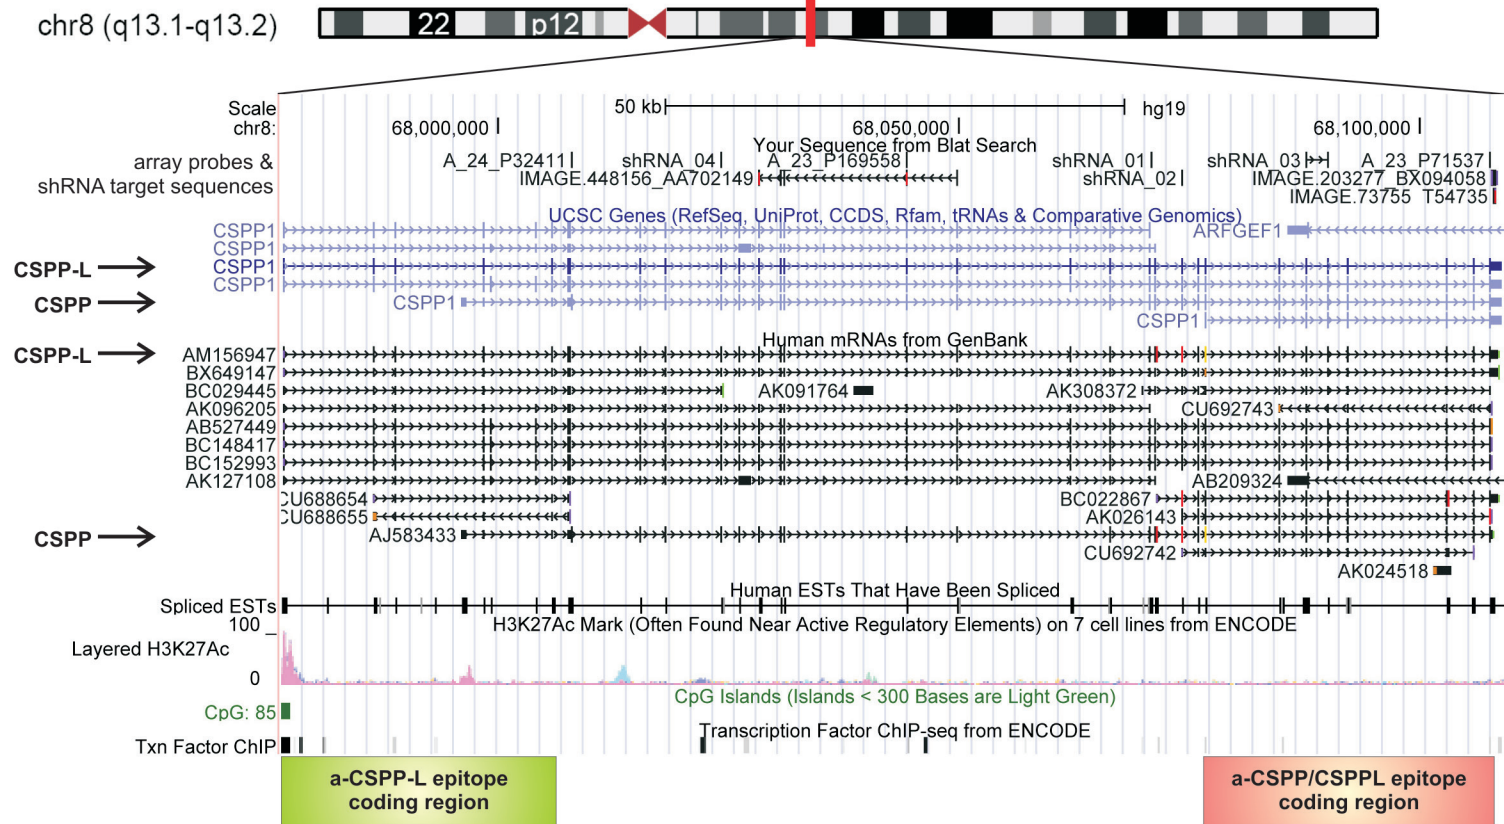

B

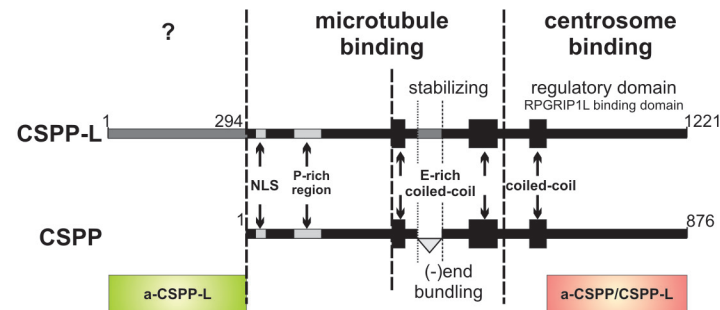

# Supplementary Figure S2

a-CSPP-L and a-CSPP/CSPP-L staining pattern in paired biopsies of normal breast tissue

**a-CSPP-L**

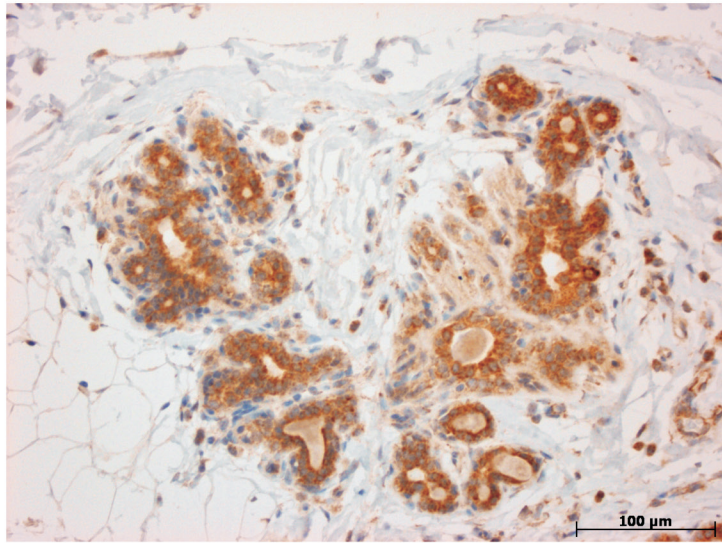

**a-CSPP/CSPP-L**

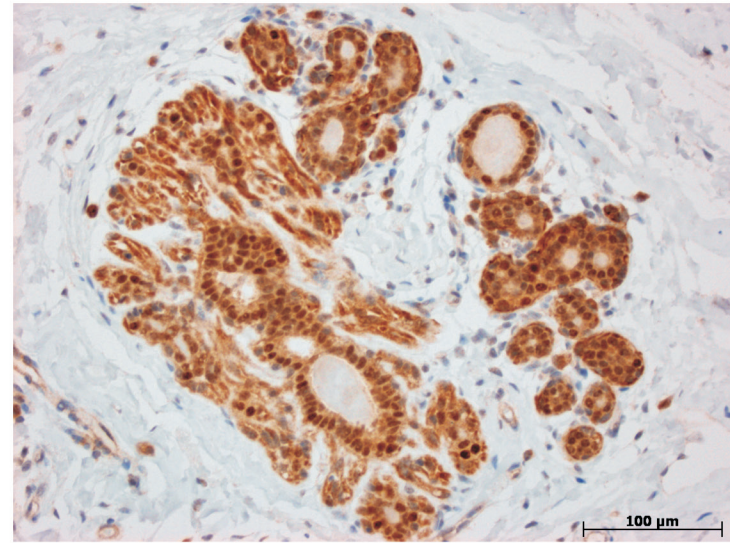

40x

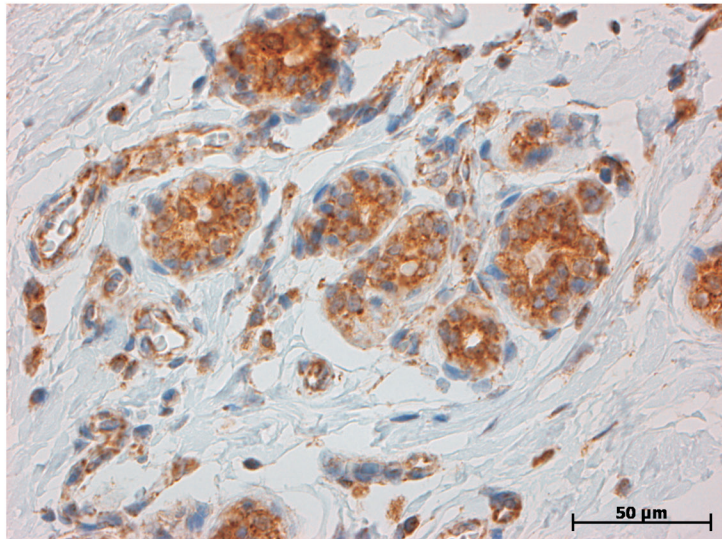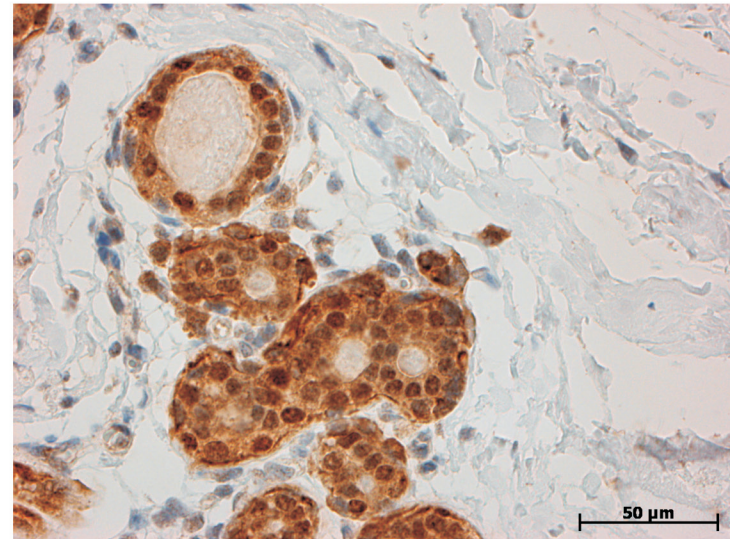

# Supplementary Figure S3

A

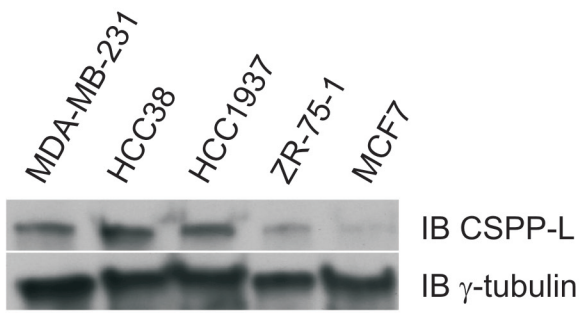

B

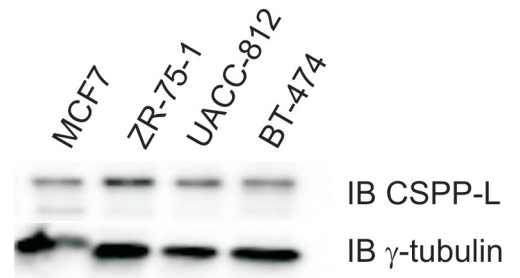

C

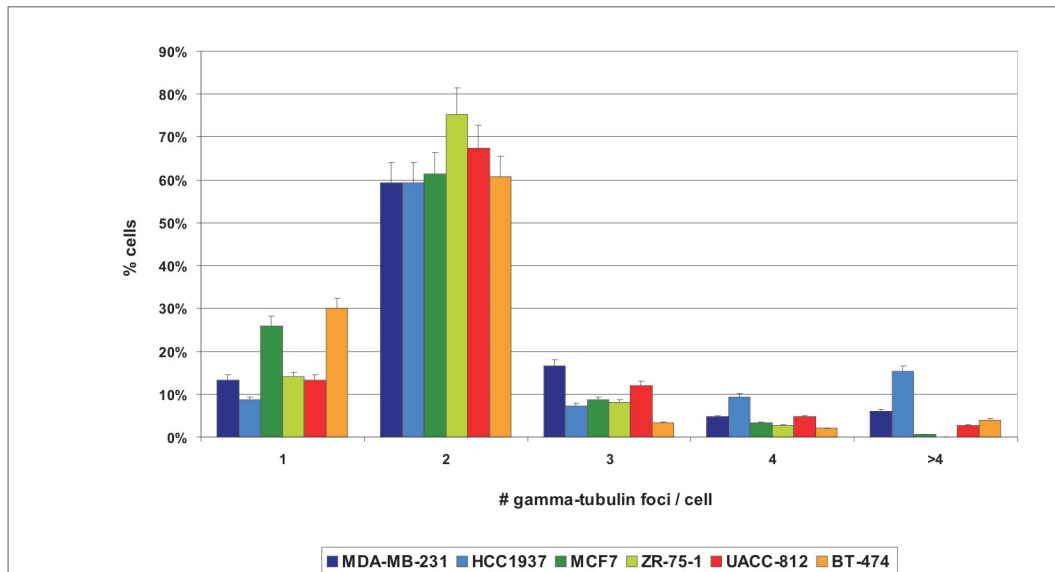



# Supplementary Figure S4

A

Oslo0/Ull cohort

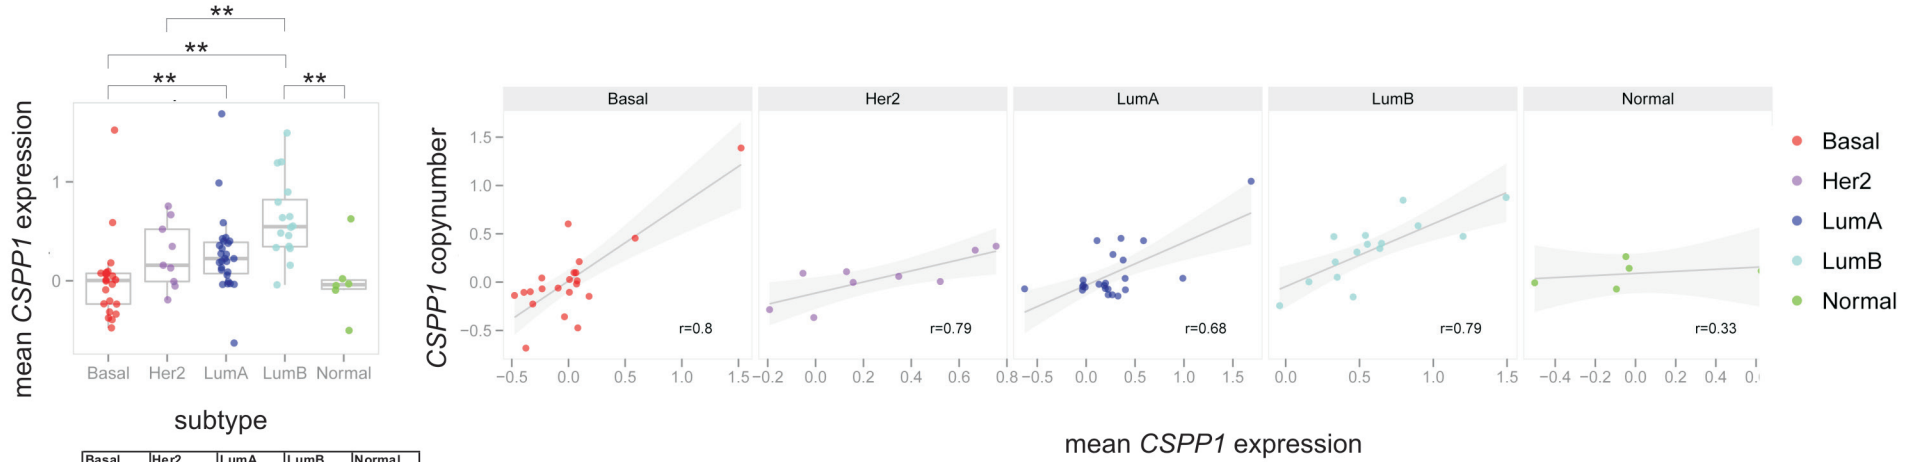

B

Oslo1/MicMa cohort

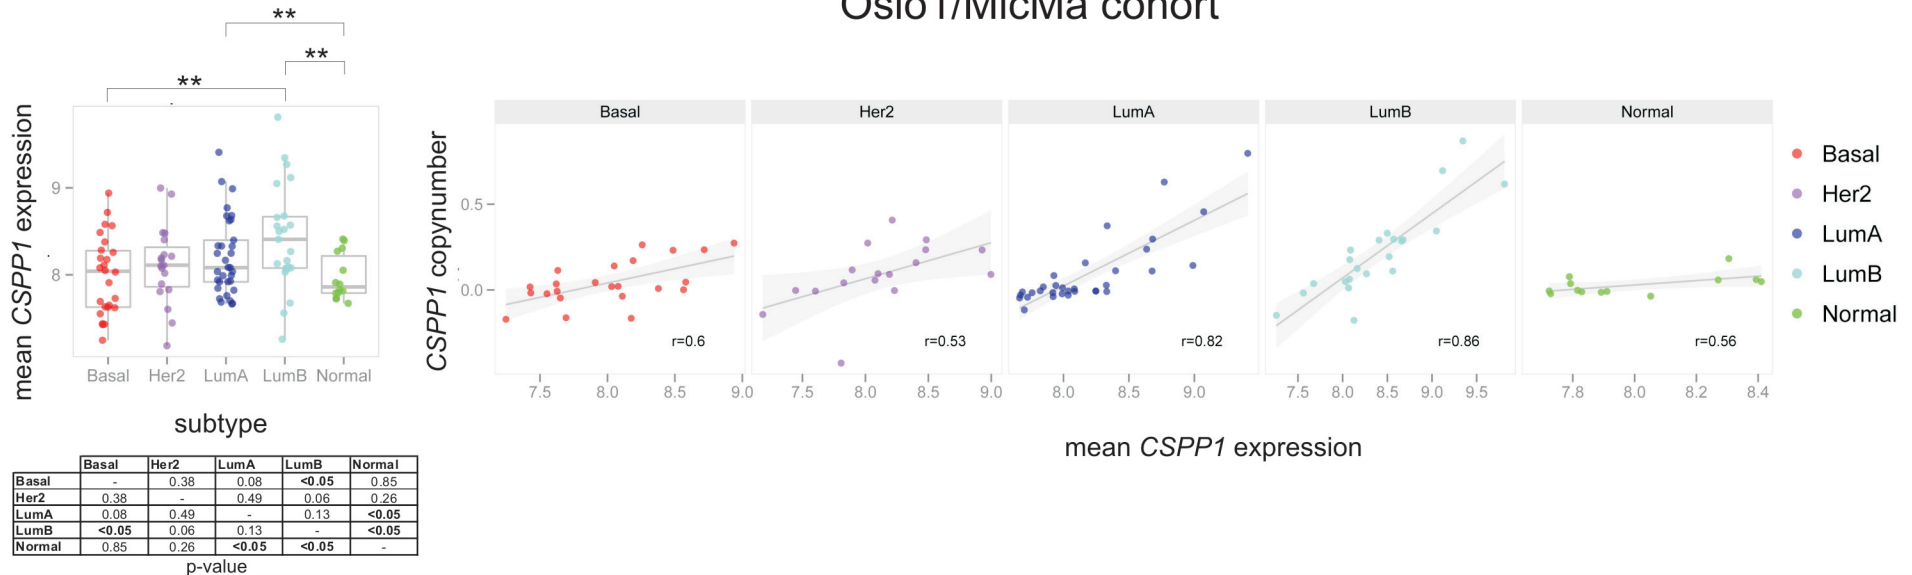

# Supplementary Figure S5

A

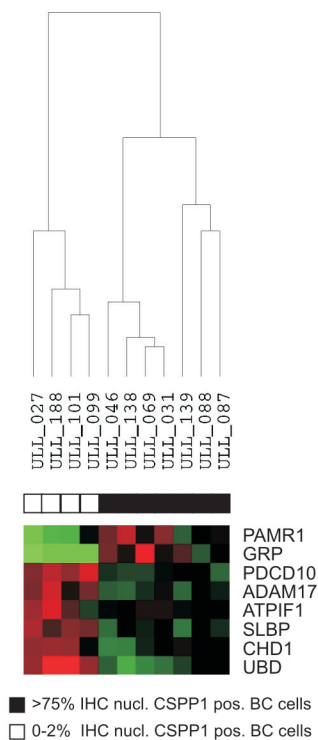

B

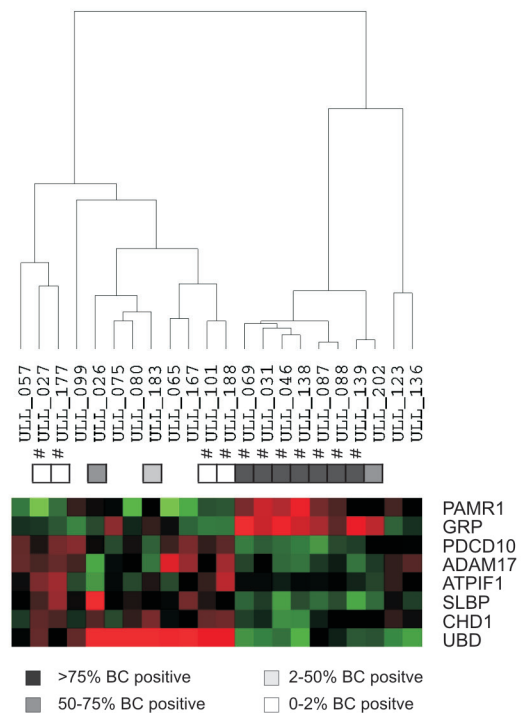

C

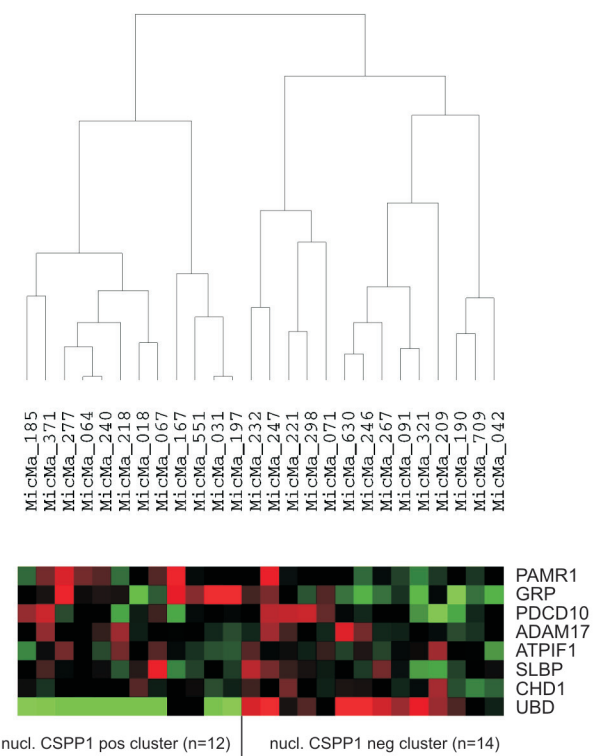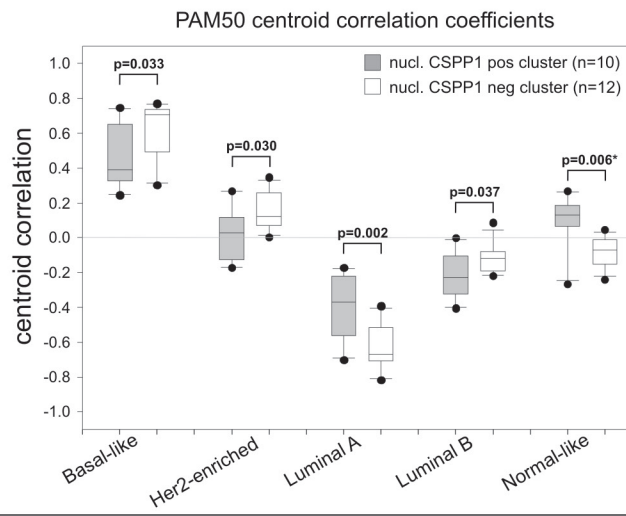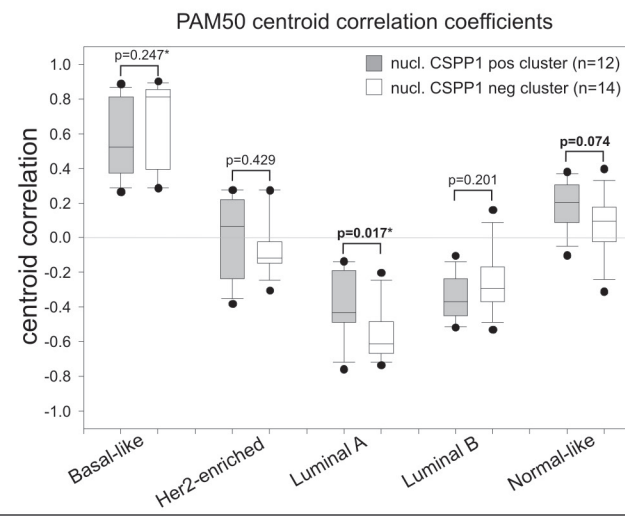

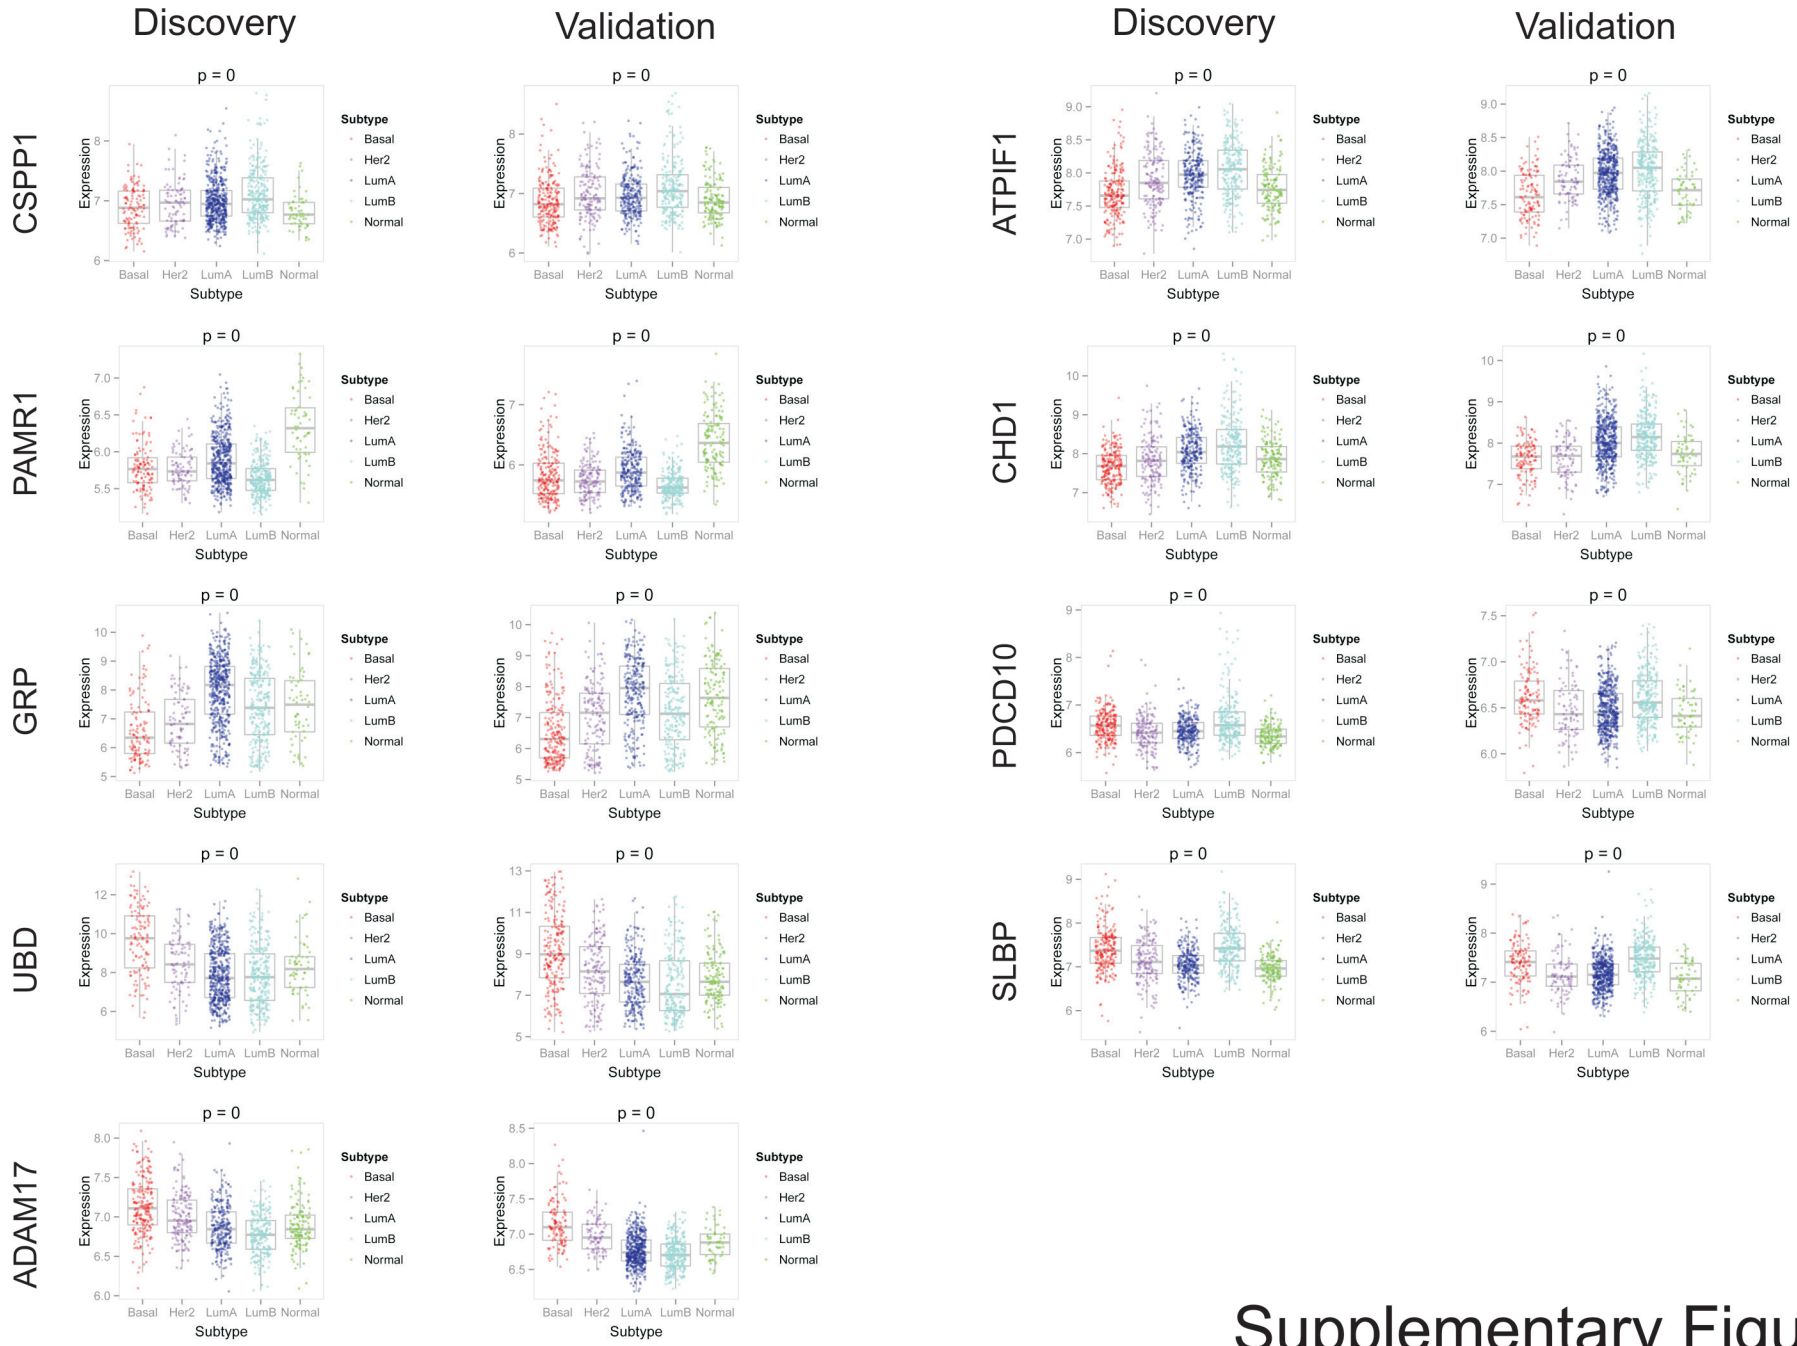

Supplementary Figure S6

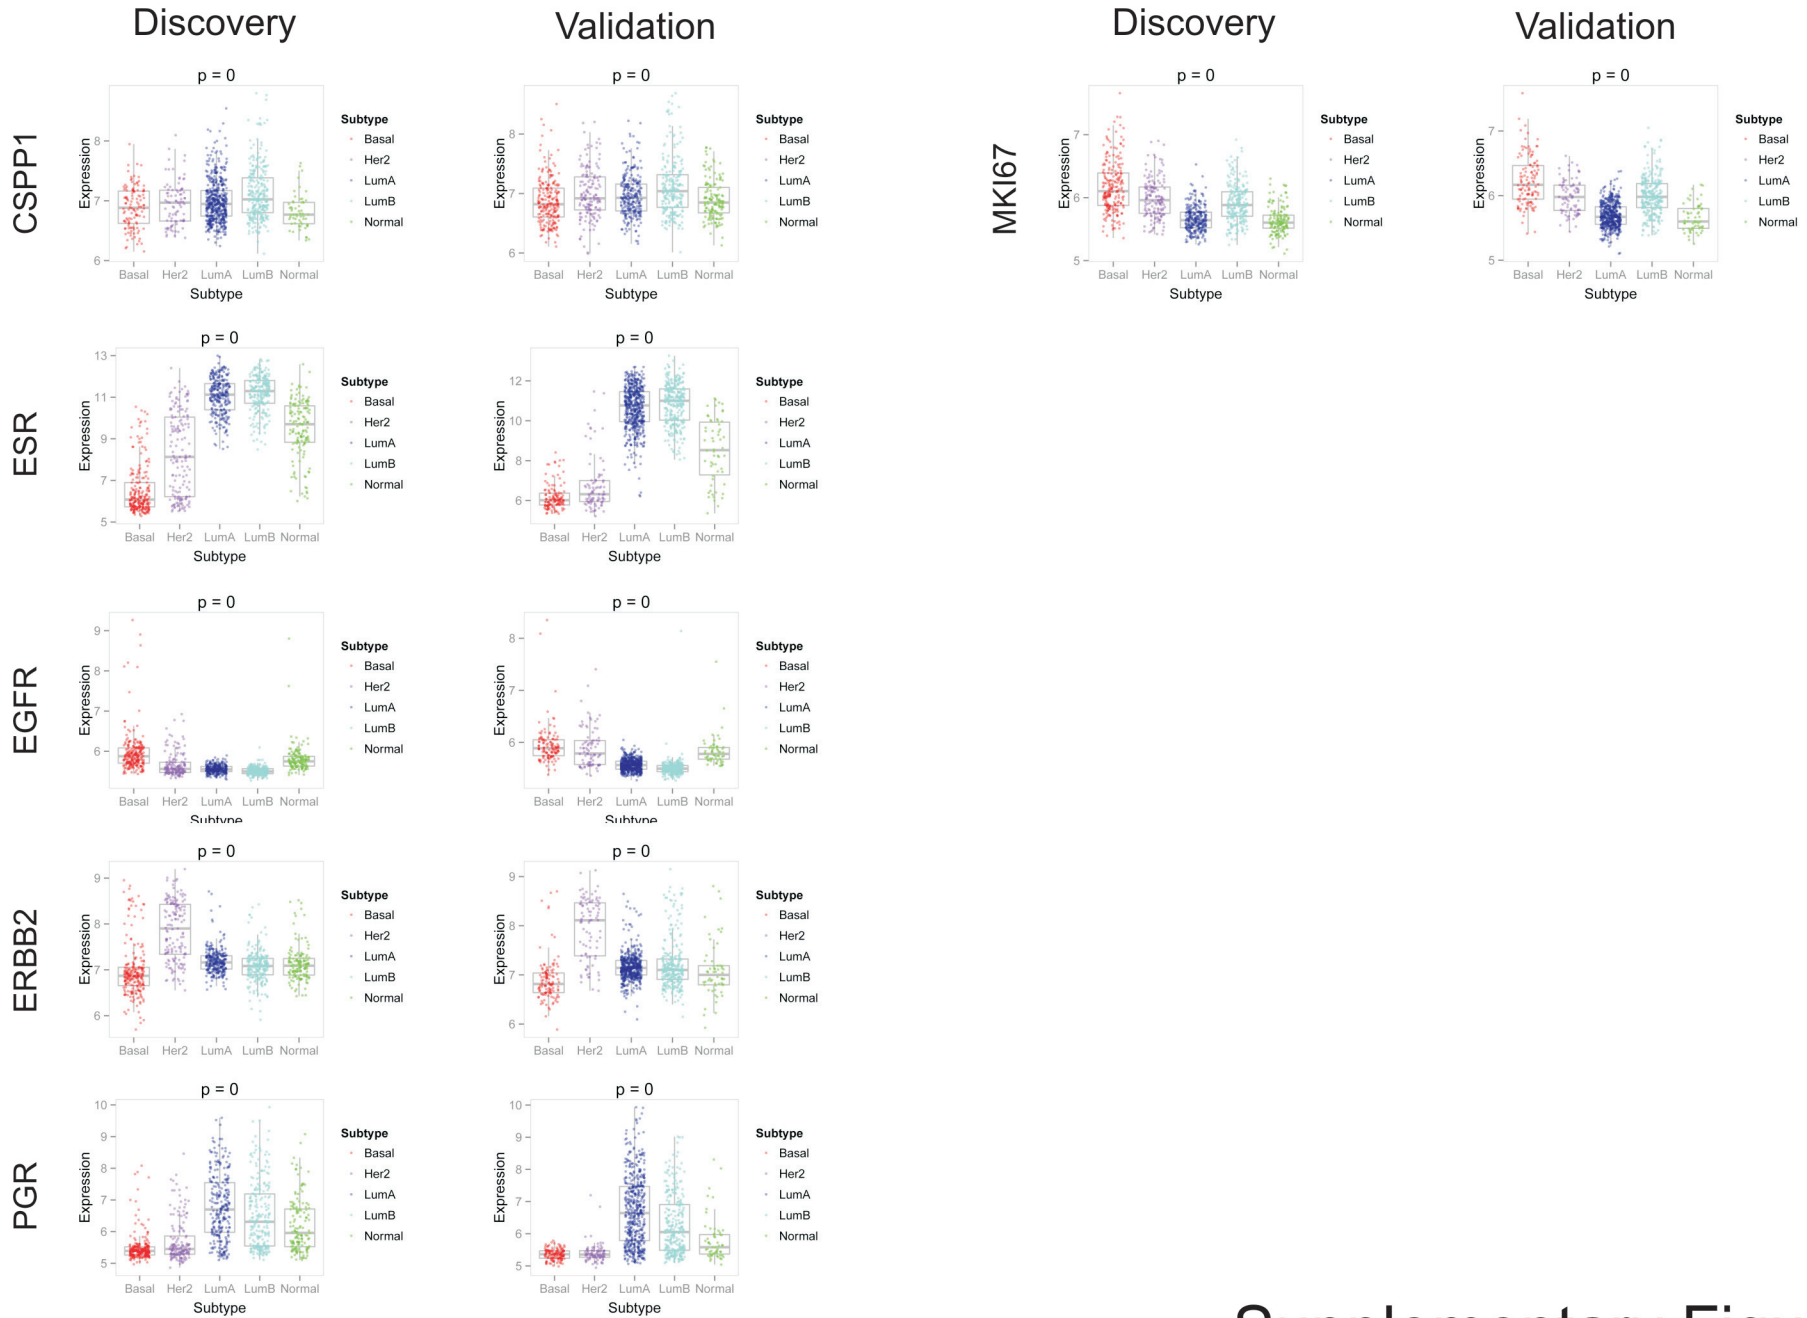

MKI67

# Supplementary Figure S8

**A**

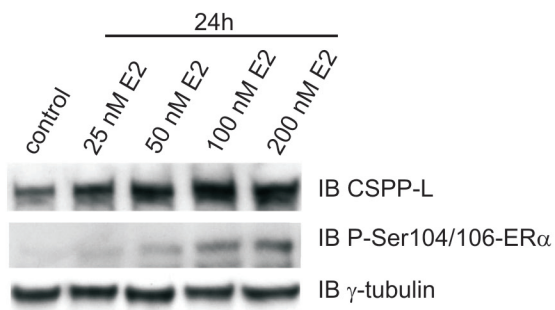

**B**

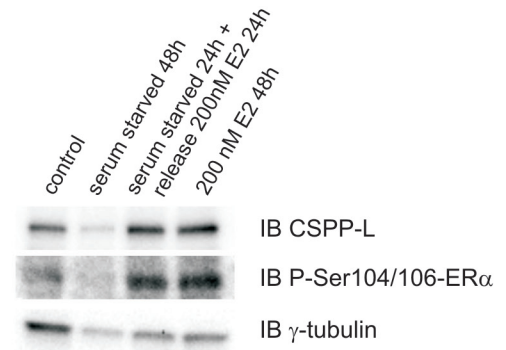

**C**

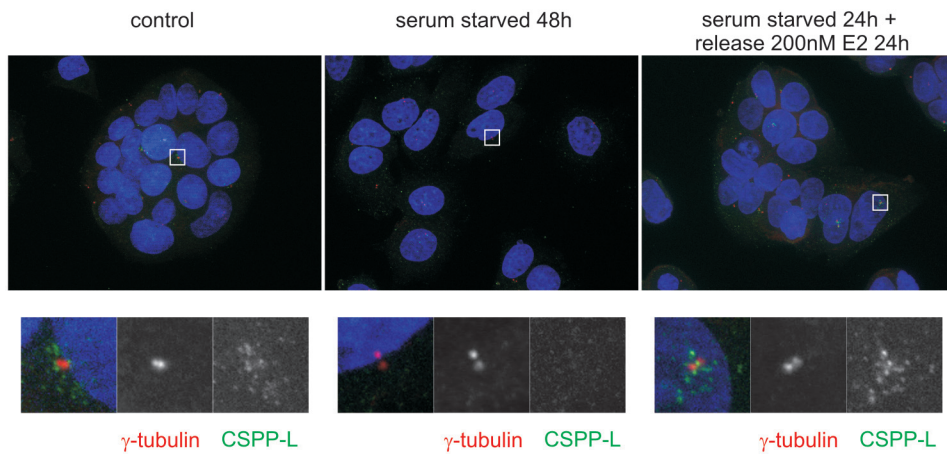

**D**

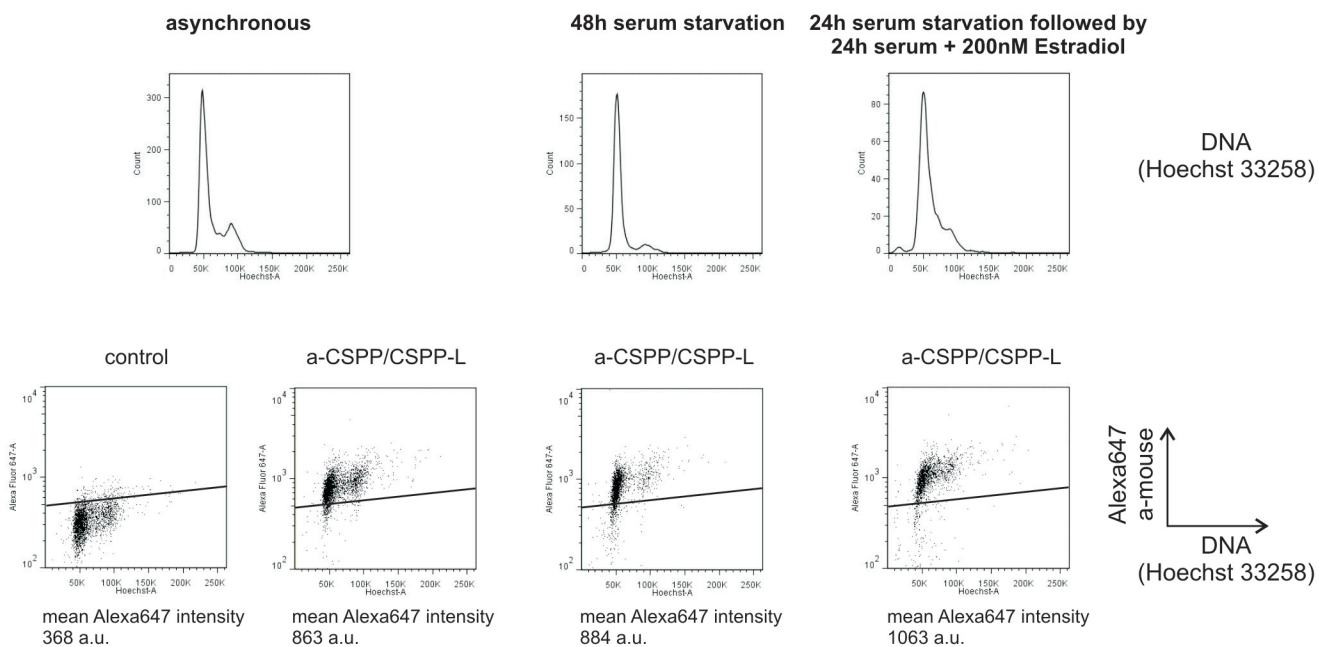

# Supplementary table 1

Cross tabulation of nuclear CSPP1 expressing cancer cell frequency and cytoplasmic CSPP1 expression

| CSPP1 nucleus<br>(freq. Nucl. Pos.) | CSPP1 cytoplasm |            |            |            |
|-------------------------------------|-----------------|------------|------------|------------|
|                                     | Negative        | Weak       | Medium     | Strong     |
| 0 (<2%)                             | 4 (40%)         | 4 (40%)    | 1 (10%)    | 1 (10%)    |
| 1 (2-50%)                           | 3 (33.3%)       | 2 (22.2%)  | 3 (33.3%)  | 1 (11.1%)  |
| 2 (50-75%)                          | 4 (22.2%)       | 6 (33.3%)  | 5 (27.8%)  | 3 (16.7%)  |
| 3 (>75%)                            | 10 (10.2%)      | 28 (28.6%) | 40 (40.8%) | 20 (20.4%) |

p= 0.177

# Supplementary table 2

## Clinico-pathological features and the nuclear CSPP1 protein groups

|                         | CSPP1 nuclear staining |           |            |            | p value          |
|-------------------------|------------------------|-----------|------------|------------|------------------|
|                         | 0                      | 1         | 2          | 3          |                  |
| <b>Histologi</b>        |                        |           |            |            |                  |
| Ductal                  | 9 (10.5%)              | 9 (10.5%) | 14 (16.3%) | 54 (62.8%) | <i>p</i> = 0.049 |
| Lobular                 | 0                      | 0         | 2 (5.7%)   | 33 (94.3%) |                  |
| Other                   | 1 (10%)                | 0         | 1 (10%)    | 8 (80%)    |                  |
| Unknown                 | 0                      | 0         | 1 (25%)    | 3 (75%)    |                  |
| <b>Stage</b>            |                        |           |            |            |                  |
| 1                       | 3 (12%)                | 1 (4%)    | 2 (8%)     | 19 (76%)   | <i>p</i> =0.710  |
| 2                       | 2 (3.7%)               | 2 (3.7%)  | 8 (14.8%)  | 42 (77.8%) |                  |
| 3                       | 2 (6.1%)               | 4 (12.1%) | 5 (15.2%)  | 22 (66.7%) |                  |
| 4                       | 0                      | 0         | 0          | 1 (100%)   |                  |
| Unknown                 | 3 (13.6%)              | 2 (9.1%)  | 3 (13.6%)  | 14 (63.6%) |                  |
| <b>Grade</b>            |                        |           |            |            |                  |
| 1                       | 0                      | 0         | 2 (25%)    | 6 (75%)    | <i>p</i> =0.552  |
| 2                       | 5 (5.2%)               | 8 (8.3%)  | 12 (12.5%) | 71 (74%)   |                  |
| 3                       | 5 (17.2%)              | 1 (3.4%)  | 4 (13.8%)  | 19 (65.5%) |                  |
| Unknown                 | 0                      | 0         | 0          | 2 (100%)   |                  |
| <b>ER</b>               |                        |           |            |            |                  |
| Negative                | 6 (12.8%)              | 1 (2.1%)  | 6 (12.8%)  | 34 (72.3%) | <i>p</i> =0.216  |
| Positive                | 3 (4.1%)               | 6 (8.2%)  | 11 (15.1%) | 53 (72.6%) |                  |
| <b>PgR</b>              |                        |           |            |            |                  |
| Negative                | 4 (8.5%)               | 4 (8.5%)  | 5 (10.6%)  | 34 (72.3%) | <i>p</i> =0.819  |
| Positive                | 5 (6%)                 | 5 (6%)    | 12 (14.5%) | 61 (73.5%) |                  |
| <b>TP53 mutation</b>    |                        |           |            |            |                  |
| wt/silent               | 4 (4.2%)               | 8 (8.4%)  | 16 (16.8%) | 67 (70.5%) | <i>p</i> =0.142  |
| mutation                | 5 (16.7%)              | 1 (3.3%)  | 2 (6.7%)   | 22 (73.3%) |                  |
| unknown                 | 1 (10%)                | 0         | 0          | 9 (90%)    |                  |
| <b>GATA3 mutation</b>   |                        |           |            |            |                  |
| wt/silent               | 5 (10.4%)              | 2 (4.2%)  | 9 (18.8%)  | 32 (66.7%) | <i>p</i> =0.265  |
| mutation                | 0                      | 1 (33.3%) | 0          | 2 (66.7%)  |                  |
| unknown                 | 4 (5.1%)               | 6 (7.6%)  | 8 (10.1%)  | 61 (77.2%) |                  |
| <b>Expression group</b> |                        |           |            |            |                  |
| Luminal A               | 1 (5.6%)               | 2 (11%)   | 3 (16.7%)  | 12 (66.7%) | <i>p</i> =0.513  |
| Luminal B               | 0                      | 2 (22.2%) | 1 (11.1%)  | 6 (66.7%)  |                  |
| HER2-enriched           | 0                      | 0         | 3 (50%)    | 3 (50%)    |                  |
| Basal-like              | 4 (28.6%)              | 1 (7.1%)  | 2 (14.3%)  | 7 (50%)    |                  |
| Normal-like             | 0                      | 0         | 1 (20%)    | 4 (80%)    |                  |
| <b>Lymphnode</b>        |                        |           |            |            |                  |
| Negative                | 6 (9.2%)               | 3 (4.6%)  | 6 (9.2%)   | 50 (76.9%) | <i>p</i> =0.319  |
| Positive                | 2 (4%)                 | 3 (6%)    | 10 (20%)   | 35 (70%)   |                  |
| Unknown                 | 2 (10%)                | 3 (15%)   | 2 (10%)    | 13 (65%)   |                  |
